# Supplementary material for: Capacity Building for Engineering Training and Technology via STEAM Education
Source: MDPI journal article supplement (doi:10.3390/educsci12110737), 2022-10-24
Supplement: s1 [file s1]

Archive with 1 entries (1 files):
- education-1957189-supplementary-updated.pdf
